# Supplementary material for: The charge states of Au on gold-substituted Ce1−xO2(111) surfaces with multiple oxygen vacancies
Source: Royal Society of Chemistry journal article supplement (doi:10.1039/c6cp02647h), 2016-01-01
Supplement: c6cp02647h1.pdf [file c6cp02647h1.pdf]

*Electronic Supplementary Information for*

**The Charge States of Au on Gold-Substituted  $\text{Ce}_{1-x}\text{O}_2(111)$   
Surfaces with Multiple Oxygen Vacancies**

Ming-Wen Chang and Wen-Shyan Sheu\*

Department of Chemistry, Fu-Jen Catholic University, Xinzhuang, New Taipei City  
24205, Taiwan, R. O. C.

\*Corresponding author. Tel.: +886 2 29053724; Fax: +886 2 29023209.

E-mail: chem1013@mails.fju.edu.tw (W.-S. Sheu).

**Table S1.** Calculated and experiment lattice constants of CeO<sub>2</sub> bulk

|                   | CeO <sub>2</sub> / Å |
|-------------------|----------------------|
| PW91+U(=5.00 eV)  | 5.49                 |
| LDA+U(=6.00 eV)   | 5.40                 |
| HSE06             | 5.40                 |
| <sup>a</sup> Exp. | 5.41                 |

*a.* L. Eyring, in: K.A. Gschneider, L. Eyring (Eds.), Handbook on the Physics and Chemistry of Rare Earths, North-Holland, Amsterdam, 1979.

**Table S2.** The Au charges predicted by various methods for selected oxygen vacancy configurations on the Au@V<sub>Ce</sub> surface with a *p*(3x3) supercell.

| Oxygen vacancy configuration                                                                    | q[Au] /  e                         |                                     |                                    |                                    |
|-------------------------------------------------------------------------------------------------|------------------------------------|-------------------------------------|------------------------------------|------------------------------------|
|                                                                                                 | <sup>a</sup> G5//G5<br>(LC=5.49 Å) | <sup>b</sup> G5//H06<br>(LC=5.49 Å) | <sup>c</sup> H06//H06<br>(LC=5.40) | <sup>d</sup> L6//L6<br>(LC=5.40 Å) |
| perfect-Au@V <sub>Ce</sub>                                                                      | 1.26                               | 1.36                                | 1.42                               | 1.31                               |
| <sup>e</sup> (V <sub>O1</sub> ) <sub>surf</sub>                                                 | 1.09                               | 1.24                                | 1.26                               | 1.12                               |
| <sup>f</sup> (V <sub>O1</sub> , V <sub>O2</sub> ) <sub>surf, surf</sub>                         | 0.39                               | 0.46                                | 0.45                               | 0.41                               |
| <sup>g</sup> (V <sub>O1</sub> , V <sub>O2</sub> , V <sub>O3</sub> ) <sub>surf, surf, surf</sub> | 0.33                               | 0.40                                | 0.40                               | 0.34                               |

- a.* Charges obtained in the present PW91+U(= 5.00 eV) calculations.
- b.* Charges predicted by HSE06 functional calculations at the relaxed surface geometry of the reduced Au@V<sub>Ce</sub> optimized by the PW91+U(= 5.00 eV) method.
- c.* Charges predicted by HSE06 functional calculations at the relaxed surface geometry of the reduced Au@V<sub>Ce</sub> optimized by the HSE06 method.
- d.* Charges predicted by LDA+U(= 6.00 eV) functional calculations at the relaxed surface geometry of the reduced Au@V<sub>Ce</sub> optimized by the LDA+U(= 6.00 eV) method.
- e.* Au-NNN configuration.
- f.* Linear-like structure.
- g.* High-Spin configuration.
- h.* All HSE06 functional calculations were performed at the gamma point.
